# Supplementary material for: The adenine nucleotide translocase family underlies cardiac ischemia-reperfusion injury through the mitochondrial permeability pore independently of cyclophilin D
Source: PubMed Central journal article supplement — Sci Adv. 2024 Dec 11;10(50):eadp7444. doi: 10.1126/sciadv.adp7444 (PMC11633734; doi:10.1126/sciadv.adp7444), 2024-12-11
Supplement: sciadv.adp7444_sm.pdf [file sciadv.adp7444_sm.pdf]

Supplementary Materials for

**The adenine nucleotide translocase family underlies cardiac ischemia-reperfusion injury through the mitochondrial permeability pore independently of cyclophilin D**

Pooja Patel *et al.*

Corresponding author: Jason Karch, [jason.karch@bcm.edu](mailto:jason.karch@bcm.edu)

*Sci. Adv.* **10**, eadp7444 (2024)  
DOI: 10.1126/sciadv.adp7444

**This PDF file includes:**

Figs. S1 to S4

# Supplementary Materials

## Supplementary Figure 1

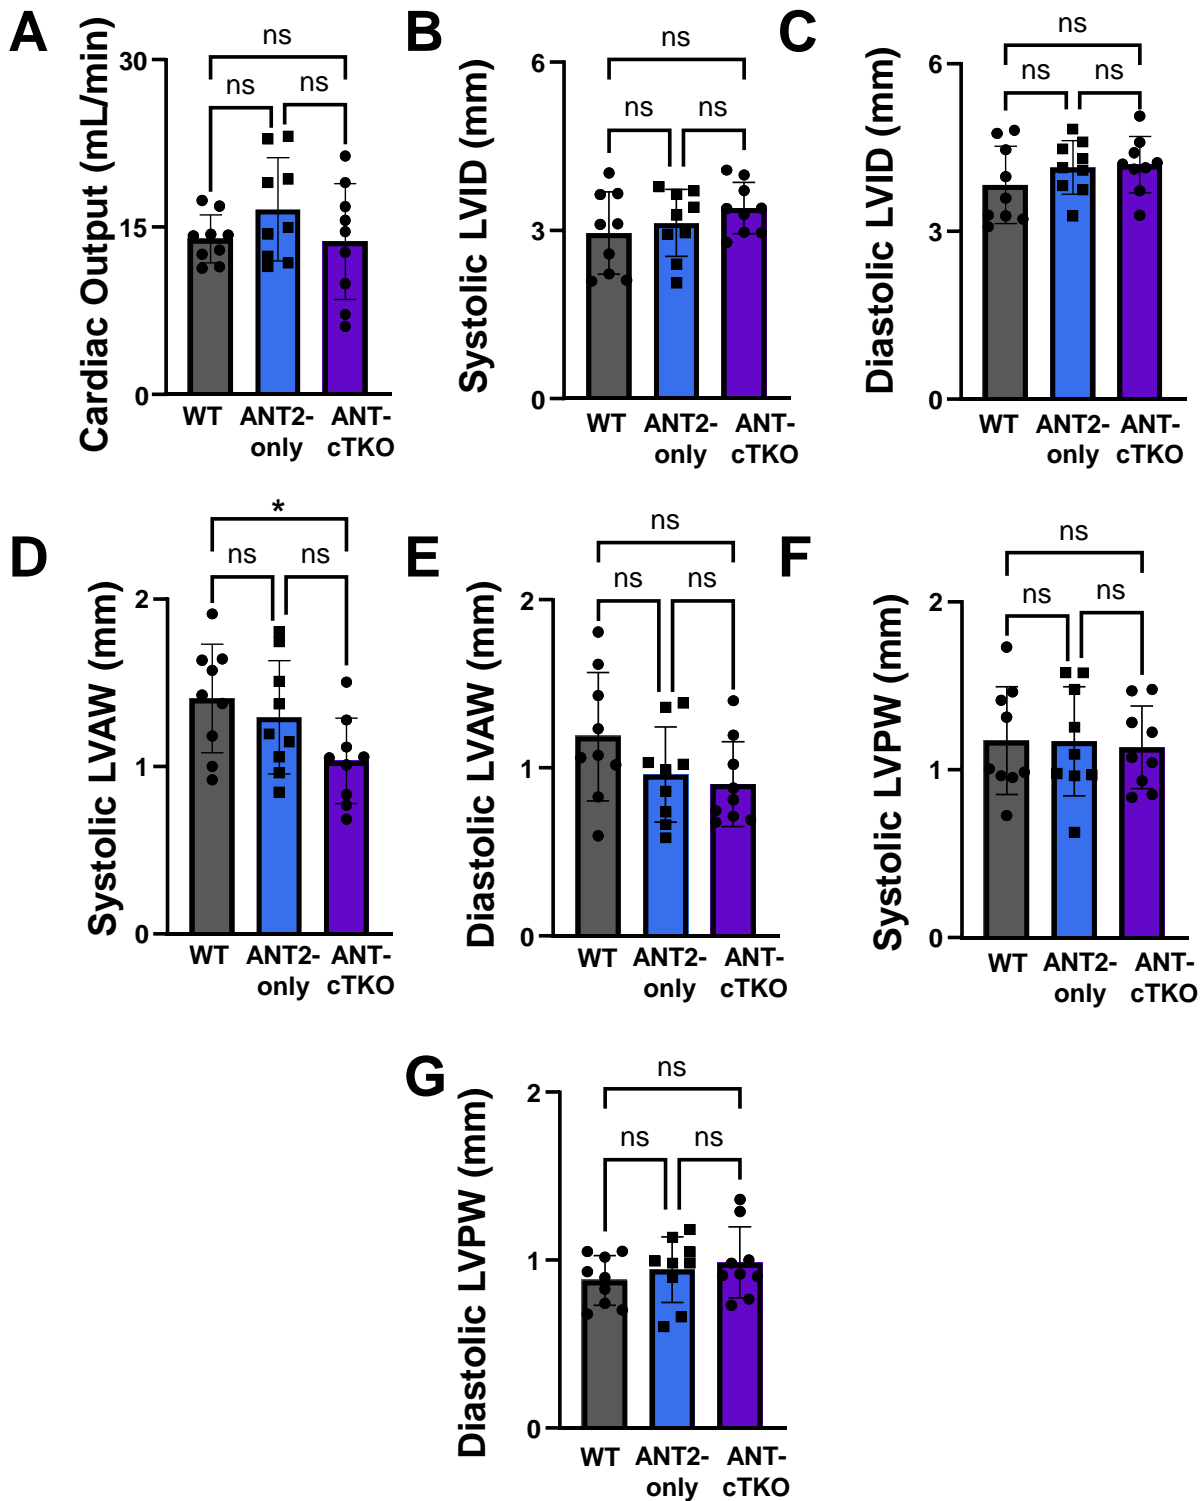

**Supplementary Figure 1: ANT-cTKO hearts are similar in function and dimension in comparison to ANT2-only hearts and WT hearts.** (A-G) Echocardiographic analysis of WT (grey), ANT2-only (blue) and ANT-cTKO (purple). All mice were 3 months of age.

# Supplementary Figure 2

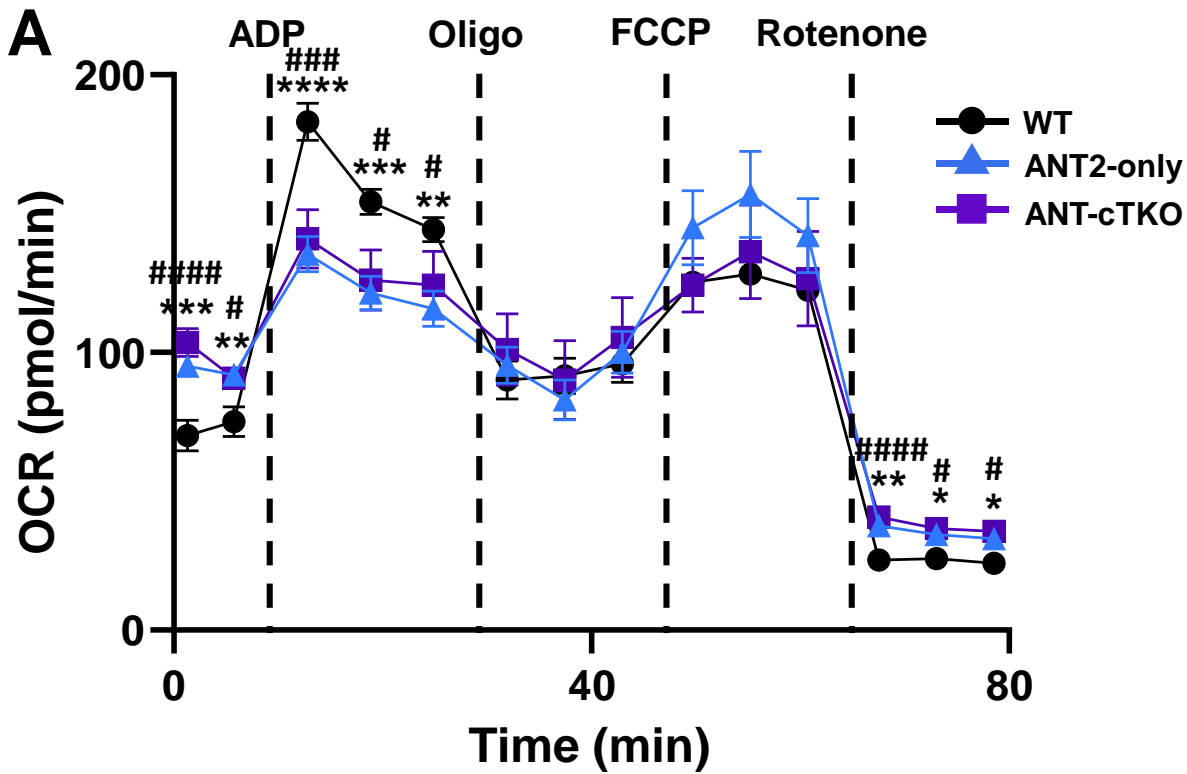

**Supplementary Figure 2: ANT-cTKO cardiac mitochondria have decreased response to ADP.** (A) Mitochondrial stress test performed on 3.5-month-old WT (black), ANT2-only (blue) and ANT cTKO (purple) heart mitochondria. Oxygen consumption rate (OCR) was measured during sequential treatments of 500  $\mu$ M ADP, 10  $\mu$ M oligomycin, 5  $\mu$ M FCCP, and 1  $\mu$ M rotenone. \* $p \leq 0.05$ , \*\* $p \leq 0.001$ , \*\*\* $p \leq 0.0001$ , \*\*\*\* $p \leq 0.00001$  comparison between WT and ANT2-only. #  $p \leq 0.05$ , ### $p \leq 0.0001$ , #### $p \leq 0.00001$  comparison between WT and ANT cTKO.

## Supplementary Figure 3

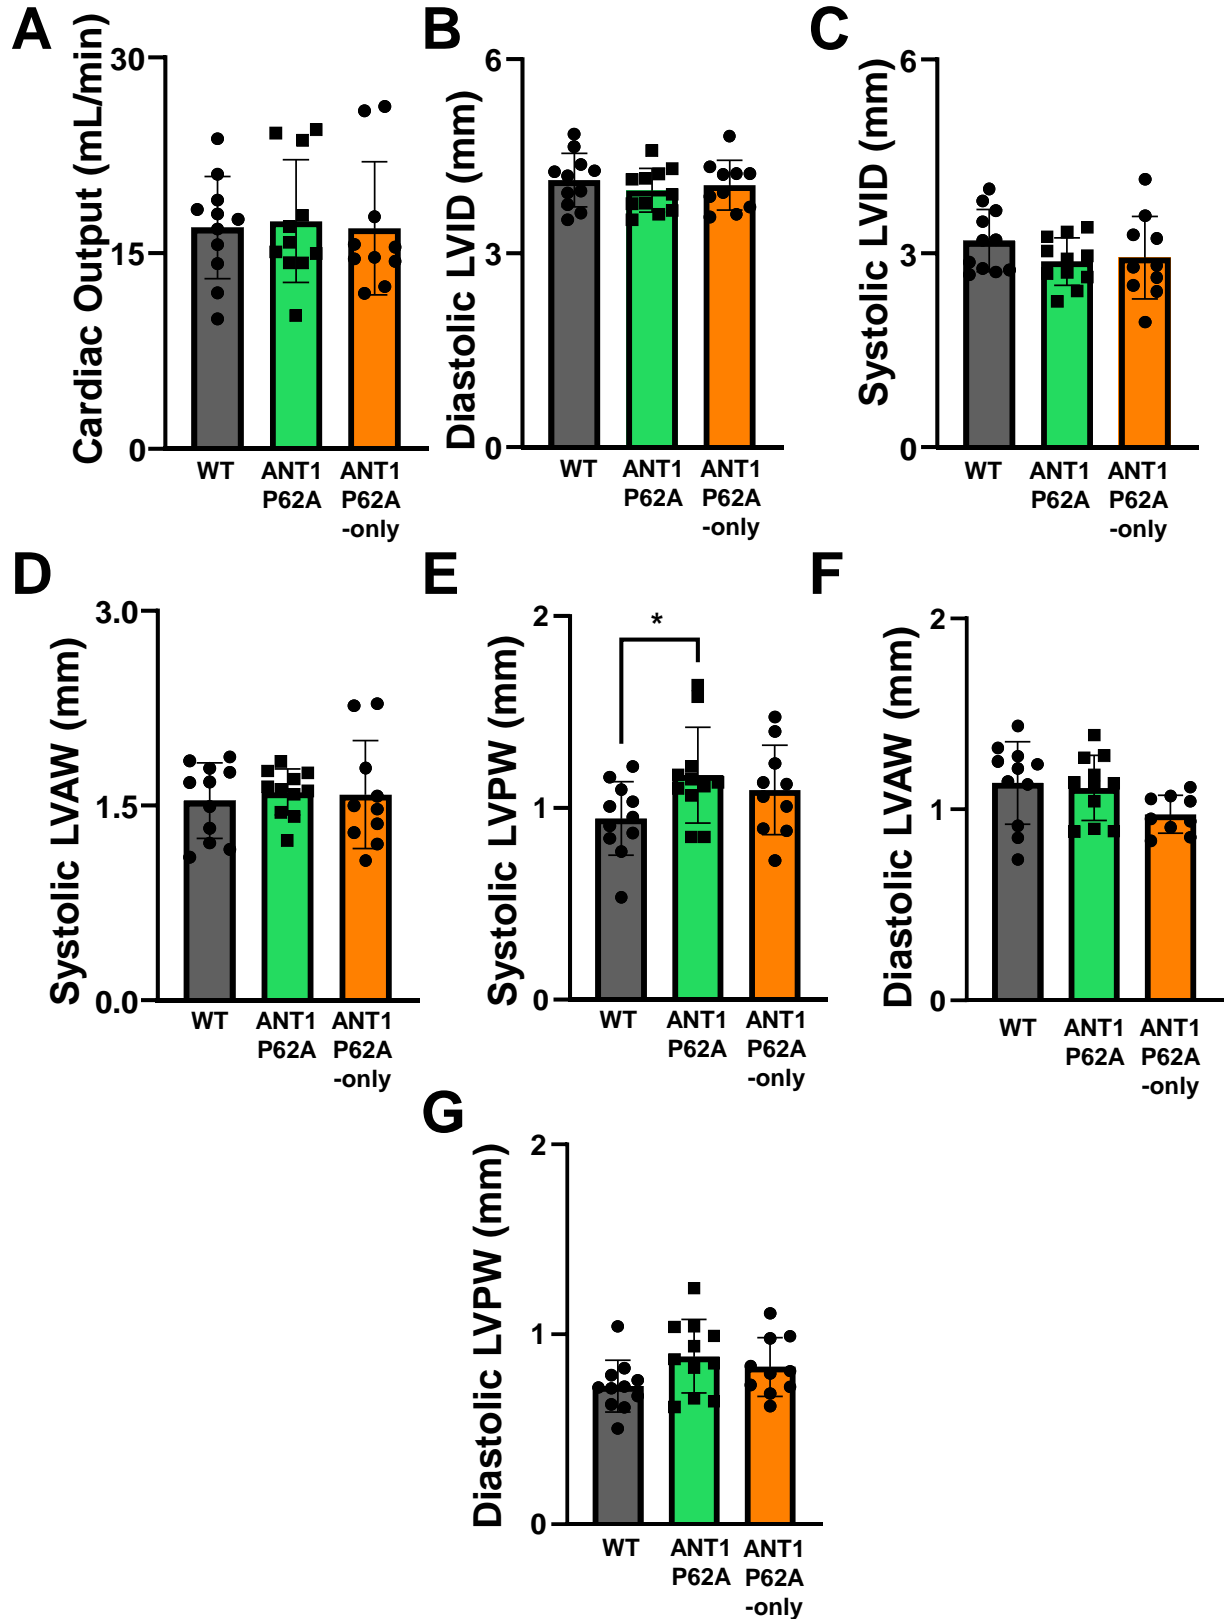

Supplemental Figure 3: ANT1P62A expressing hearts and ANT1P62A-only expressing hearts are similar in function and dimension as WT hearts. (A-G) Echocardiographic analysis of 3-month-old WT (dark grey, n=12), ANT1P62A (green, n=12) and ANT1P62A-only mice (orange, n=10). \*p<0.05.

# Supplementary Figure 4

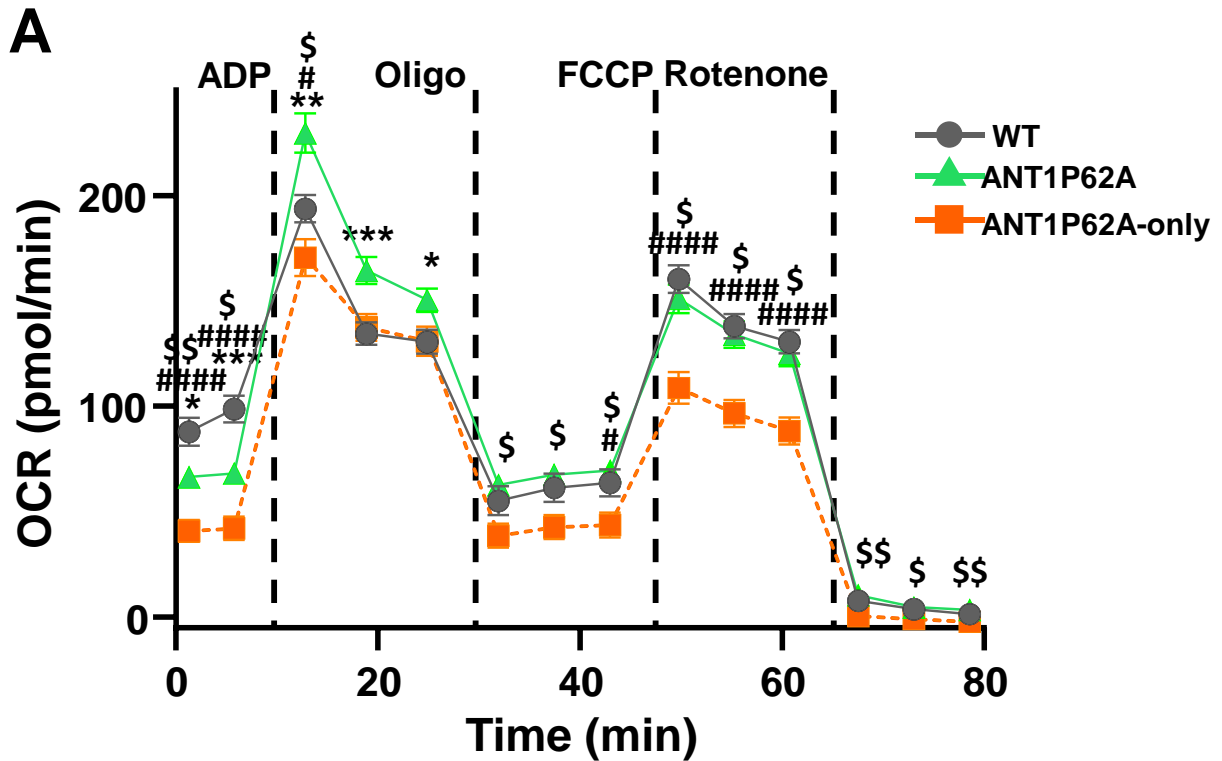

**Supplemental Figure 4: ANT1P62A-only expressing mitochondria have reduced OCR and maximal respiratory capacity.** (A) Mitochondrial stress test performed on 3-month-old WT (grey), ANT1P62A (green) and ANT1P62A-only (orange) heart mitochondria. Oxygen consumption rate (OCR) was measured during sequential treatments of 500  $\mu$ M ADP, 10  $\mu$ M oligomycin, 5  $\mu$ M FCCP, and 1  $\mu$ M rotenone. \* $p \leq 0.05$ , \*\* $p \leq 0.001$ , \*\*\* $p \leq 0.0001$  comparison between WT and ANT1P62A. #  $p \leq 0.05$ , #### $p \leq 0.00001$  comparison between WT and ANT1P62A-only. \$ $p \leq 0.05$ , \$\$ $p \leq 0.001$  comparison between ANT1P62A and ANT1P62A-only.
